# Supplementary material for: Creation of a superhydrophobic surface from a sublimed smectic liquid crystal
Source: Royal Society of Chemistry journal article supplement (doi:10.1039/c4ra03005b), 2014-01-01
Supplement: c4ra03005b1.pdf [file c4ra03005b1.pdf]

## Supporting Information for:

### Creation of a Superhydrophobic Surface from a Sublimed Smectic Liquid Crystal

**Dae Seok Kim,<sup>a</sup> Yun Jeong Cha,<sup>a</sup> Hanim Kim,<sup>a</sup> Mun Ho Kim,<sup>b</sup> Yun Ho Kim,<sup>c</sup> Dong Ki Yoon<sup>\*a</sup>**

*a* Graduate School of Nanoscience and Technology and Center for Nature-inspired Technology in KAIST Institute for the NanoCentury, KAIST, Daejeon, 305-701, Republic of Korea. Fax: +82 42 350 1110; Tel: +82 42 350 1116;

E-mail: [nandk@kaist.ac.kr](mailto:nandk@kaist.ac.kr)

*b* Reliability Assessment Center for Chemical Materials, Korea Research Institute of Chemical Technology, Daejeon 305-600, Republic of Korea.

*c* Advanced Functional Materials Research Group, Korea Research Institute of Chemical Technology, Daejeon 305-600, Republic of Korea

*ESI, Figure S1§*

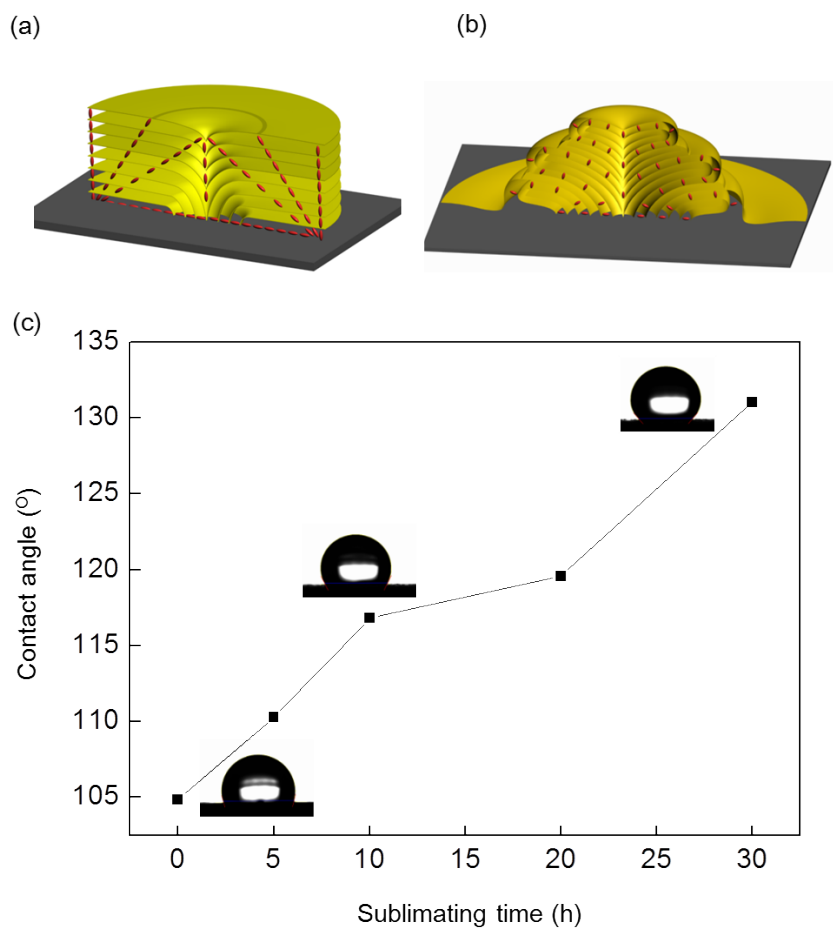

**Fig. S1** (a, b) The schematic illustrations of single TFCD and its sublimed TFCD. (c) CA measurements of water droplets on sublimed TFCD arrays on a flat Si substrate as a function of sublimating time.

**ESI, Figure S2§**

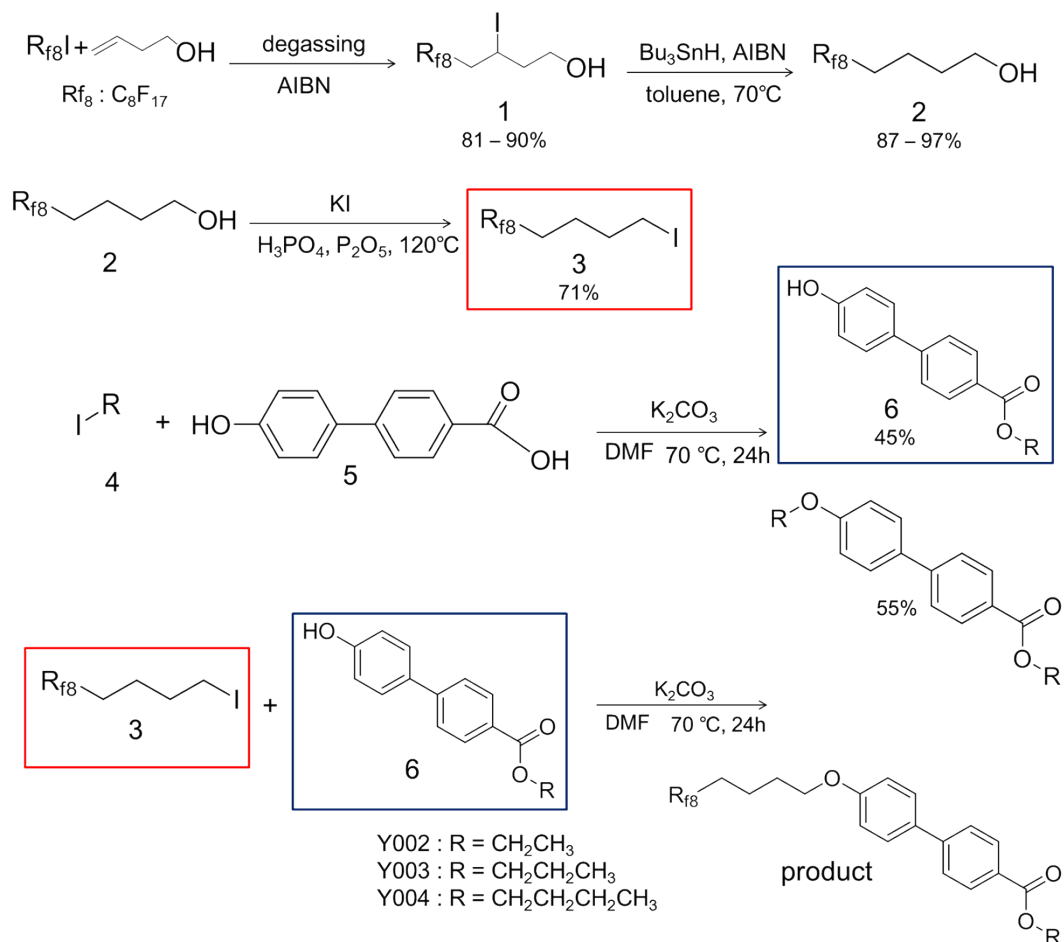

**Fig. S2** Semi-fluorinated liquid crystalline materials **Y002**, **Y003**, and **Y004** were synthesized by the procedure used for the alkylation of ethyl, propyl, and butyl 4'-hydroxy-4-biphenyl carboxylate with 1H,1H,2H,2H,3H,3H,4H,4H-perfluorododecyl iodide in DMF at 70°C under reflux with K<sub>2</sub>CO<sub>3</sub>.<sup>15</sup>

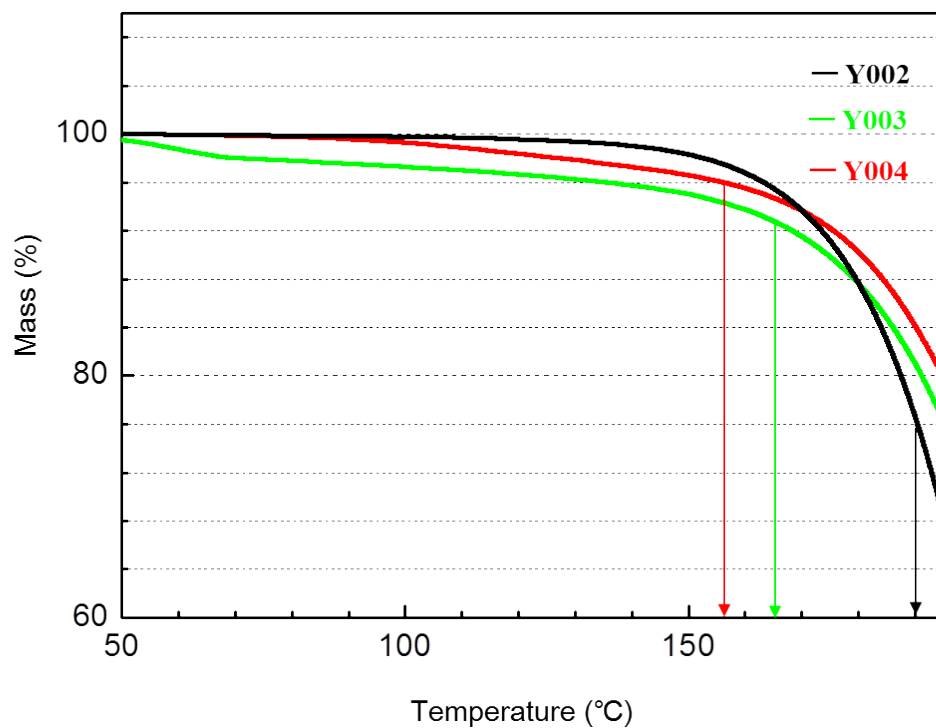

**Fig. S3** Thermogravimetric (TGA) results of **Y002**, **Y003**, and **Y004** during cooling (cooling rate:  $1^{\circ}\text{C min}^{-1}$ ) shows that sublimation occurred before the material reached their respective isotropic temperatures. The arrows indicate the respective isotropic temperature of each material.

*ESI, Figure S4§*

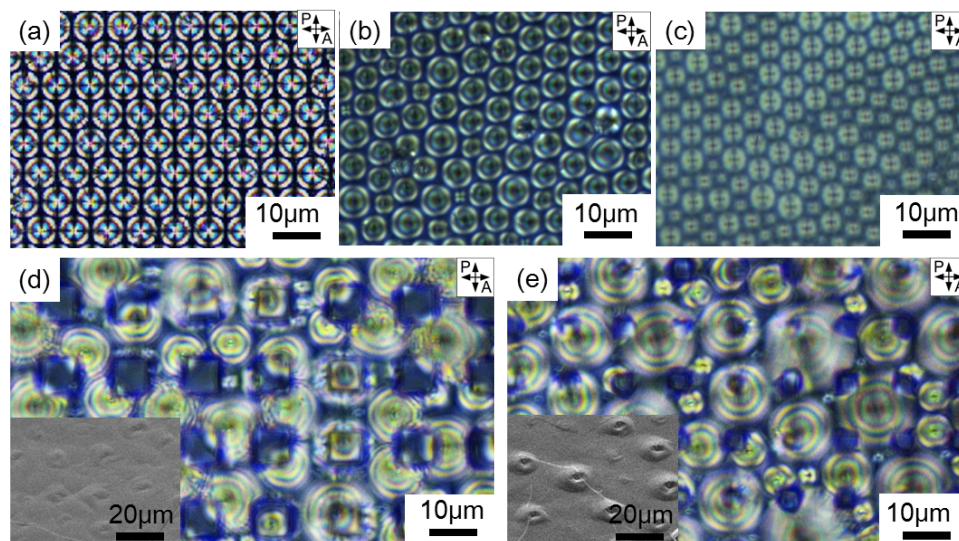

**Fig. S4** DRLM images of: (a-c) normal TFCDs of **Y002-Y004** on planar anchoring substrates. (d-e) epitaxially-assembled TFCDs of **Y002** on square-pillar arrays with  $l = 10 \mu\text{m}$  and  $l = 5 \mu\text{m}$ , respectively. Insets of (d, e) are corresponding SEM micrographs.

*ESI, Figure S5§*

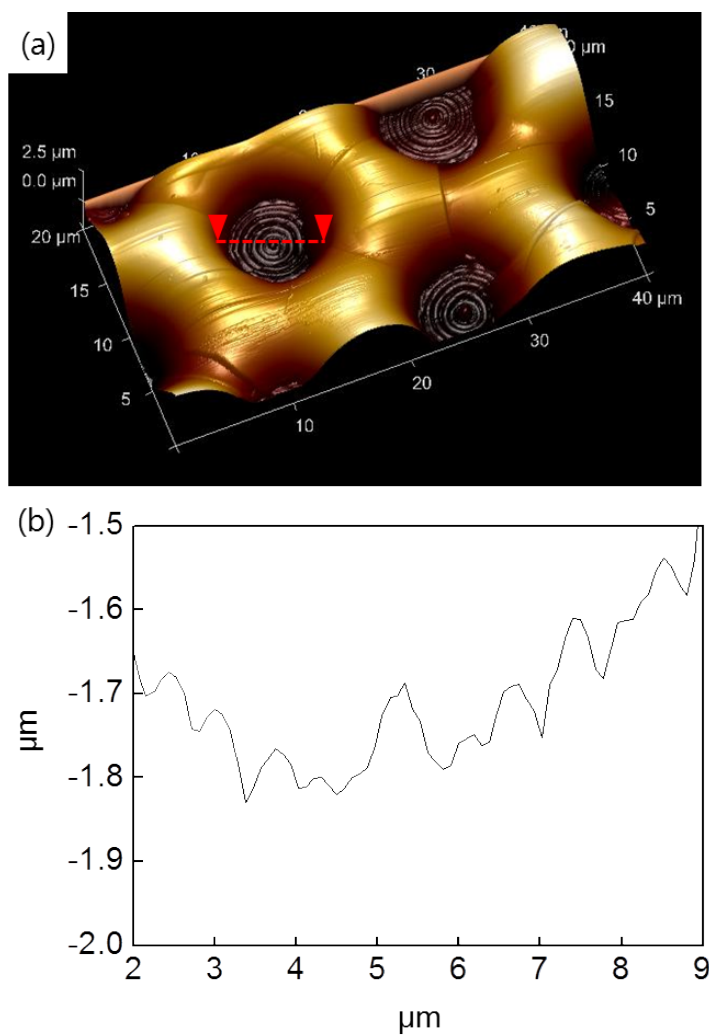

**Fig. S5** (a-b) AFM image and height profile of circular hemi-cylinders in single TFCD on a flat Si substrate.

*ESI, Figure S6§*

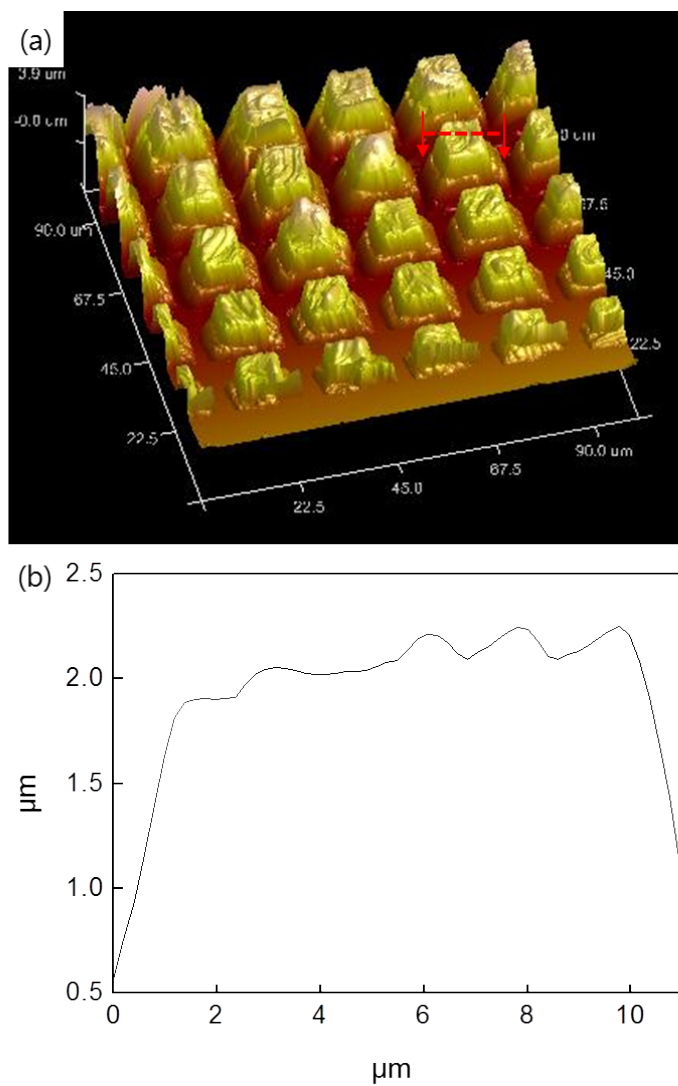

**Fig. S6** (a-b) AFM images and height profile of hemi-cylinders with TFCDs on pillar arrays ( $l=10 \mu\text{m}$ ).

*ESI, Figure S7§*

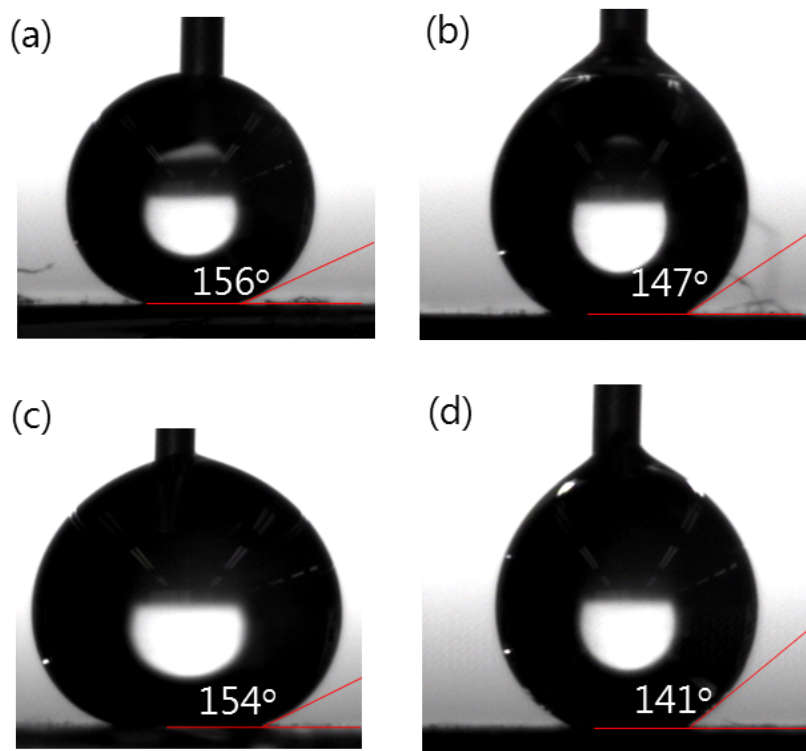

**Fig. S7** CA hysteresis. The advancing angle and receding angle of a water droplet on the sublimed TF CDs on pillar patterns. (a, b) for  $l = 10 \mu\text{m}$  and (c, d) for  $l = 5 \mu\text{m}$ .



*ESI, Figure S8*

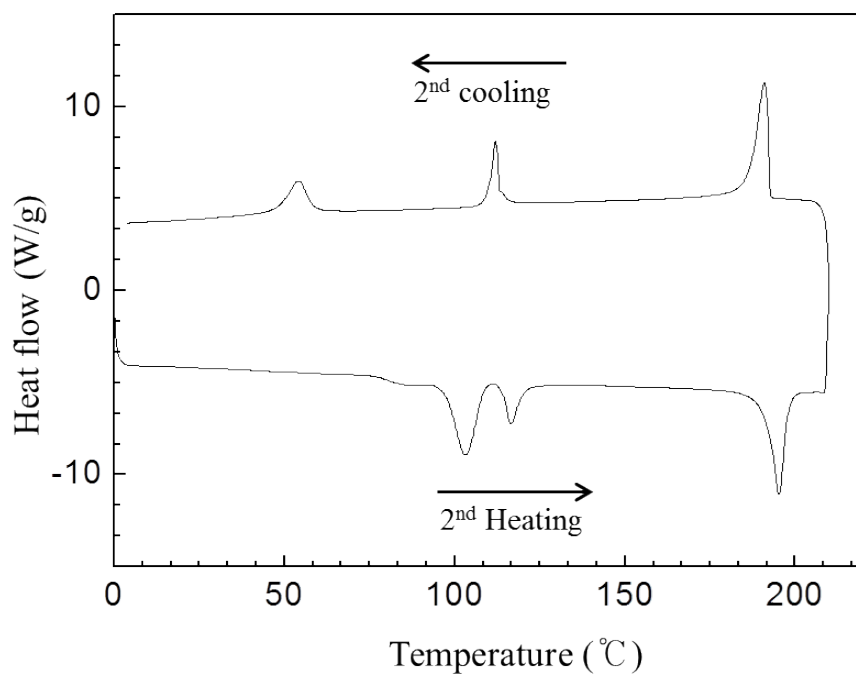

**Fig. S8** DSC thermograms for 2<sup>nd</sup> heating and 2<sup>nd</sup> cooling cycles for **Y002**. The temperature scan rate was 10°C/min and N<sub>2</sub> purged into the sample chamber (50mL/min).
